# Supplementary material for: Disease Severity and Risk Factors of 30-Day Hospital Readmission in Pediatric Hospitalizations for Pneumonia
Source: MDPI journal article supplement (doi:10.3390/jcm11051185), 2022-02-23
Supplement: s1 [file s1]

## Supplemental Materials

**Table S1.** ICD-10 diagnosis and procedure codes for pneumonia and relevant comorbidities

| Diagnosis/Procedure            |                                              | ICD-10 code type | ICD-10-CM/ICD-10-PCS codes                                                                                                                                                                                                                                                                                                                                                                                  |
|--------------------------------|----------------------------------------------|------------------|-------------------------------------------------------------------------------------------------------------------------------------------------------------------------------------------------------------------------------------------------------------------------------------------------------------------------------------------------------------------------------------------------------------|
| Pneumonia                      |                                              | ICD-10-CM        | J09X1, J100, J1000, J1001, J1008, J110, J1100, J1108, J120, J121, J122, J123, J1281, J1282, J1289, J129, J13, J14, J15, J16, J17, J18, A221, A3701, A3711, A3781, A3791, A481, B250, B440, B7781                                                                                                                                                                                                            |
| Severe pneumonia               | Respiratory failure                          | ICD-10-CM        | Newborn: P220, P285, P2881<br>Pediatric: J96, J80, R0603                                                                                                                                                                                                                                                                                                                                                    |
|                                | Sepsis                                       | ICD-10-CM        | A40, A41, R651, R6511, R6520, R6521                                                                                                                                                                                                                                                                                                                                                                         |
|                                | Mechanical ventilation                       | ICD-10-PCS       | 5A09357, 5A09457, 5A09557, 5A1935Z, 5A1945Z, 5A1955Z                                                                                                                                                                                                                                                                                                                                                        |
|                                | Dependence on supplemental oxygen, long-term | ICD-10-CM        | Z9981                                                                                                                                                                                                                                                                                                                                                                                                       |
|                                | Respiratory intubation                       | ICD-10-CM        | 09HN7BZ, 09HN8BZ, 0BH13EZ, 0BH17EZ, 0BH18EZ, 0CHY7BZ, 0CHY8BZ, 0DH57BZ, 0DH58BZ, 0WHQ73Z, 0WHQ7YZ                                                                                                                                                                                                                                                                                                           |
| Asthma                         |                                              | ICD-10-CM        | J45                                                                                                                                                                                                                                                                                                                                                                                                         |
| Acute bronchitis/bronchiolitis |                                              | ICD-10-CM        | J20, J21                                                                                                                                                                                                                                                                                                                                                                                                    |
| Cancer (any type)              |                                              | ICD-10-CM        | C00-C96                                                                                                                                                                                                                                                                                                                                                                                                     |
| Chronic pulmonary disease      |                                              | ICD-10-CM        | J410, J411, J418, J42, J430, J431, J432, J438, J439, J440, J441, J449, J4520, J4521, J4522, J4530, J4531, J4532, J4540, J4541, J4542, J4550, J4551, J4552, J45901, J45902, J45909, J45990, J45991, J45998, J470, J471, J479, J60, J61, J620, J628, J630, J631, J632, J633, J634, J635, J636, J64, J65, J660, J661, J662, J668, J670, J671, J672, J673, J674, J675, J676, J677, J678, J679, J684, J701, J703 |
| Cystic fibrosis                |                                              | ICD-10-CM        | E84                                                                                                                                                                                                                                                                                                                                                                                                         |
| Sickle cell disease (SCD)      |                                              | ICD-10-CM        | D5700, D5701, D5702, D5703, D5709, D571, D5720, D57211, D57212, D57213, D57218, D57219, D5740, D57411, D57412, D57413, D57418, D57419, D5742, D57431, D57432, D57433, D57438, D57439, D5744, D57451, D57452, D57453, D57458, D57459, D5780, D57811, D57812, D57813, D57818, D57819                                                                                                                          |

**Table S2.** Sensitivity analysis 1 – Risk factors associated with 30-day pneumonia-specific readmission for pediatric pneumonia

| <b>Covariate</b>                | <b>Adjusted Odds Ratio (95% CI)</b> |
|---------------------------------|-------------------------------------|
| <b>Severe pneumonia</b>         | 1.48 (1.16, 1.86)*                  |
| <b>Age group</b>                |                                     |
| < 1 year                        | Reference                           |
| 1-4 years                       | 0.87 (0.61, 1.22)                   |
| 5-12 years                      | 0.95 (0.66, 1.38)                   |
| 13-17 years                     | 1.23 (0.80, 1.90)                   |
| <b>Female</b>                   | 1.27 (1.03, 1.58)*                  |
| <b>Expected primary payer</b>   |                                     |
| Private insurance               | Reference                           |
| Medicare                        | 0.55 (0.08, 3.99)                   |
| Medicaid                        | 1.15 (0.91, 1.45)                   |
| Self-pay                        | 1.64 (0.24, 1.76)                   |
| No charge                       | 1.50 (0.82, 2.75)                   |
| <b>Length of stay</b>           | 1.01 (0.99, 1.04)                   |
| <b>Daily cost</b>               |                                     |
| 0-25th percentile               | Reference                           |
| 26th-50th percentile (median)   | 0.90 (0.65, 1.23)                   |
| 51st-75th percentile            | 0.99 (0.72, 1.35)                   |
| 76th-100th percentile           | 0.83 (0.59, 1.15)                   |
| <b>Asthma</b>                   | 0.83 (0.66, 1.06)                   |
| <b>Cancer, any type</b>         | 1.40 (0.57, 3.48)                   |
| <b>Cystic fibrosis</b>          | 1.50 (0.82, 2.73)                   |
| <b>Sickle cell disease</b>      | 1.68 (0.78, 3.61)                   |
| <b>Hospital size</b>            |                                     |
| Small                           | Reference                           |
| Medium                          | 1.26 (0.87, 1.84)                   |
| Large                           | 1.00 (0.72, 1.40)                   |
| <b>Hospital teaching status</b> |                                     |
| Non-metropolitan hospital       | Reference                           |
| Metropolitan non-teaching       | 0.51 (0.26, 1.00)                   |
| Metropolitan teaching           | 0.92 (0.59, 1.44)                   |
| <b>Hospital case volume</b>     |                                     |
| 0-25th percentile               | Reference                           |
| 26th-50th percentile (median)   | 1.37 (0.94, 2.00)                   |
| 51st-75th percentile            | 1.61 (1.09, 2.38)*                  |
| 76th-100th percentile           | 2.03 (1.38, 2.99)*                  |

\*Odds ratio is statistically significant

**Table S3.** Sensitivity analysis 2 – Risk factors associated with 30-day all-cause readmission for pediatric pneumonia **using HCUP severity class**

| Covariate                       | Adjusted Odds Ratio (95% CI) |
|---------------------------------|------------------------------|
| <b>HCUP severity class</b>      |                              |
| Minor loss of function          | Reference                    |
| Moderate loss of function       | 1.75 (1.42, 2.14)*           |
| Major loss of function          | 3.92 (3.18, 4.83)*           |
| Extreme loss of function        | 5.48 (4.31, 6.98)*           |
| <b>Age group</b>                |                              |
| < 1 year                        | Reference                    |
| 1-4 years                       | 0.83 (0.68, 1.00)            |
| 5-12 years                      | 0.83 (0.68, 1.02)            |
| 13-17 years                     | 1.06 (0.84, 1.33)            |
| <b>Female</b>                   | 1.02 (0.91, 1.15)            |
| <b>Expected primary payer</b>   |                              |
| Private insurance               | Reference                    |
| Medicare                        | 1.89 (1.02, 3.42)*           |
| Medicaid                        | 1.15 (1.01, 1.31)*           |
| Self-pay                        | 0.44 (0.22, 0.86)*           |
| No charge                       | 1.29 (0.90, 1.84)            |
| <b>Length of stay</b>           | 1.01 (1.00, 1.03)            |
| <b>Daily cost</b>               |                              |
| 0-25th percentile               | Reference                    |
| 26th-50th percentile (median)   | 1.04 (0.86, 1.26)            |
| 51st-75th percentile            | 1.09 (0.91, 1.32)            |
| 76th-100th percentile           | 1.06 (0.87, 1.28)            |
| <b>Asthma</b>                   | 0.76 (0.66, 0.86)*           |
| <b>Cancer, any type</b>         | 3.93 (2.79, 5.52)*           |
| <b>Cystic fibrosis</b>          | 0.66 (0.47, 0.93)*           |
| <b>Sickle cell disease</b>      | 1.87 (1.26, 2.78)*           |
| <b>Hospital size</b>            |                              |
| Small                           | Reference                    |
| Medium                          | 0.99 (0.80, 1.23)            |
| Large                           | 1.04 (0.87, 1.25)            |
| <b>Hospital teaching status</b> |                              |
| Non-metropolitan hospital       | Reference                    |
| Metropolitan non-teaching       | 0.77 (0.52, 1.14)            |
| Metropolitan teaching           | 1.20 (0.90, 1.60)            |
| <b>Hospital case volume</b>     |                              |
| 0-25th percentile               | Reference                    |
| 26th-50th percentile (median)   | 1.26 (1.02, 1.55)*           |
| 51st-75th percentile            | 1.26 (1.02, 1.57)*           |
| 76th-100th percentile           | 1.28 (1.03, 1.58)*           |

\*Odds ratio is statistically significant
